# Supplementary material
Source: MDPI journal article supplement (https://www.mdpi.com/2304-6740/6/2/61)

# checkCIF/PLATON report

You have not supplied any structure factors. As a result the full set of tests cannot be run.

THIS REPORT IS FOR GUIDANCE ONLY. IF USED AS PART OF A REVIEW PROCEDURE FOR PUBLICATION, IT SHOULD NOT REPLACE THE EXPERTISE OF AN EXPERIENCED CRYSTALLOGRAPHIC REFEREE.

No syntax errors found.      CIF dictionary      Interpreting this report

## Datablock: c\_\_~1\_\_dyop~3\_sl248

---

Bond precision:    C-C = 0.0104 Å                      Wavelength=0.71073

Cell:                      a=16.0038(8)              b=16.5124(8)              c=26.6249(10)  
                            alpha=90                      beta=90                      gamma=90  
Temperature:              123 K

|                | Calculated                   | Reported             |
|----------------|------------------------------|----------------------|
| Volume         | 7035.9(6)                    | 7035.9(6)            |
| Space group    | P c c n                      | Pccn                 |
| Hall group     | -P 2ab 2ac                   | ?                    |
| Moiety formula | C72 H60 Dy N2 O10 P4, N O3 ? |                      |
| Sum formula    | C72 H60 Dy N3 O13 P4         | C72 H60 Dy N3 O13 P4 |
| Mr             | 1461.61                      | 1461.61              |
| Dx,g cm-3      | 1.380                        | 1.380                |
| Z              | 4                            | 4                    |
| Mu (mm-1)      | 1.216                        | 1.216                |
| F000           | 2972.0                       | 2972.0               |
| F000'          | 2974.04                      |                      |
| h,k,lmax       | 20,21,34                     | 20,21,34             |
| Nref           | 8088                         | 8081                 |
| Tmin,Tmax      | 0.652,0.784                  | 0.652,0.784          |
| Tmin'          | 0.539                        |                      |

Correction method= # Reported T Limits: Tmin=0.652 Tmax=0.784  
AbsCorr = MULTI-SCAN

Data completeness= 0.999                      Theta(max)= 27.500

R(reflections)= 0.0637( 6095)              wR2(reflections)= 0.1853( 8081)

S = 1.124                      Npar= 457

---

The following ALERTS were generated. Each ALERT has the format

**test-name\_ALERT\_alert-type\_alert-level.**

Click on the hyperlinks for more details of the test.

---

**Alert level A**

|                   |                           |     |       |      |      |
|-------------------|---------------------------|-----|-------|------|------|
| PLAT430_ALERT_2_A | Short Inter D...A Contact | O4S | ..05S | 2.00 | Ang. |
| PLAT430_ALERT_2_A | Short Inter D...A Contact | O5S | ..05S | 2.20 | Ang. |

---

**Alert level B**

|                   |                |                             |     |      |
|-------------------|----------------|-----------------------------|-----|------|
| PLAT216_ALERT_3_B | Disordered O4S | (An/Solv) ADP max/min Ratio | 7.9 | Note |
|-------------------|----------------|-----------------------------|-----|------|

---

**Alert level C**

|                   |                                                  |         |        |
|-------------------|--------------------------------------------------|---------|--------|
| PLAT094_ALERT_2_C | Ratio of Maximum / Minimum Residual Density .... | 2.06    | Report |
| PLAT221_ALERT_2_C | Solv./Anion Resd 2 O Ueq(max)/Ueq(min) Range     | 4.6     | Ratio  |
| PLAT342_ALERT_3_C | Low Bond Precision on C-C Bonds .....            | 0.01044 | Ang.   |

---

**Alert level G**

|                   |                                                  |        |        |
|-------------------|--------------------------------------------------|--------|--------|
| PLAT002_ALERT_2_G | Number of Distance or Angle Restraints on AtSite | 7      | Note   |
| PLAT003_ALERT_2_G | Number of Uiso or Uij Restrained non-H Atoms ... | 5      | Report |
| PLAT005_ALERT_5_G | No Embedded Refinement Details Found in the CIF  | Please | Do !   |
| PLAT066_ALERT_1_G | Predicted and Reported Tmin&Tmax Range Identical | ?      | Check  |
| PLAT083_ALERT_2_G | SHELXL Second Parameter in WGHT Unusually Large  | 48.91  | Why ?  |
| PLAT093_ALERT_1_G | No s.u.'s on H-positions, Refinement Reported as | mixed  | Check  |
| PLAT300_ALERT_4_G | Atom Site Occupancy of O1S Constrained at        | 0.25   | Check  |
| PLAT300_ALERT_4_G | Atom Site Occupancy of O2S Constrained at        | 0.25   | Check  |
| PLAT300_ALERT_4_G | Atom Site Occupancy of O3S Constrained at        | 0.25   | Check  |
| PLAT300_ALERT_4_G | Atom Site Occupancy of N1S Constrained at        | 0.25   | Check  |
| PLAT300_ALERT_4_G | Atom Site Occupancy of O4S Constrained at        | 0.5    | Check  |
| PLAT300_ALERT_4_G | Atom Site Occupancy of O5S Constrained at        | 0.5    | Check  |
| PLAT300_ALERT_4_G | Atom Site Occupancy of N2S Constrained at        | 0.5    | Check  |
| PLAT302_ALERT_4_G | Anion/Solvent/Minor-Residue Disorder (Resd 2 )   | 100%   | Note   |
| PLAT302_ALERT_4_G | Anion/Solvent/Minor-Residue Disorder (Resd 3 )   | 100%   | Note   |
| PLAT789_ALERT_4_G | Atoms with Negative _atom_site_disorder_group #  | 4      | Check  |
| PLAT790_ALERT_4_G | Centre of Gravity not Within Unit Cell: Resd. #  | 2      | Note   |
|                   | N O3                                             |        |        |
| PLAT860_ALERT_3_G | Number of Least-Squares Restraints .....         | 38     | Note   |
| PLAT899_ALERT_4_G | SHELXL97 is Deprecated and Succeeded by SHELXL   | 2018   | Note   |

---

- 2 **ALERT level A** = Most likely a serious problem - resolve or explain  
1 **ALERT level B** = A potentially serious problem, consider carefully  
3 **ALERT level C** = Check. Ensure it is not caused by an omission or oversight  
19 **ALERT level G** = General information/check it is not something unexpected

- 2 ALERT type 1 CIF construction/syntax error, inconsistent or missing data  
7 ALERT type 2 Indicator that the structure model may be wrong or deficient  
3 ALERT type 3 Indicator that the structure quality may be low  
12 ALERT type 4 Improvement, methodology, query or suggestion  
1 ALERT type 5 Informative message, check
-

It is advisable to attempt to resolve as many as possible of the alerts in all categories. Often the minor alerts point to easily fixed oversights, errors and omissions in your CIF or refinement strategy, so attention to these fine details can be worthwhile. In order to resolve some of the more serious problems it may be necessary to carry out additional measurements or structure refinements. However, the purpose of your study may justify the reported deviations and the more serious of these should normally be commented upon in the discussion or experimental section of a paper or in the "special\_details" fields of the CIF. checkCIF was carefully designed to identify outliers and unusual parameters, but every test has its limitations and alerts that are not important in a particular case may appear. Conversely, the absence of alerts does not guarantee there are no aspects of the results needing attention. It is up to the individual to critically assess their own results and, if necessary, seek expert advice.

### **Publication of your CIF in IUCr journals**

A basic structural check has been run on your CIF. These basic checks will be run on all CIFs submitted for publication in IUCr journals (*Acta Crystallographica*, *Journal of Applied Crystallography*, *Journal of Synchrotron Radiation*); however, if you intend to submit to *Acta Crystallographica Section C* or *E* or *IUCrData*, you should make sure that full publication checks are run on the final version of your CIF prior to submission.

### **Publication of your CIF in other journals**

Please refer to the *Notes for Authors* of the relevant journal for any special instructions relating to CIF submission.

### **Validation response form**

Please find below a validation response form (VRF) that can be filled in and pasted into your CIF.

```
# start Validation Reply Form
_vrf_PLAT430_c__~1__dyop~3_sl248
;
PROBLEM: Short Inter D...A Contact  O4S      ..O5S      2.00 Ang.
RESPONSE: ...
;
# end Validation Reply Form
```

---

**PLATON version of 30/01/2018; check.def file version of 30/01/2018**

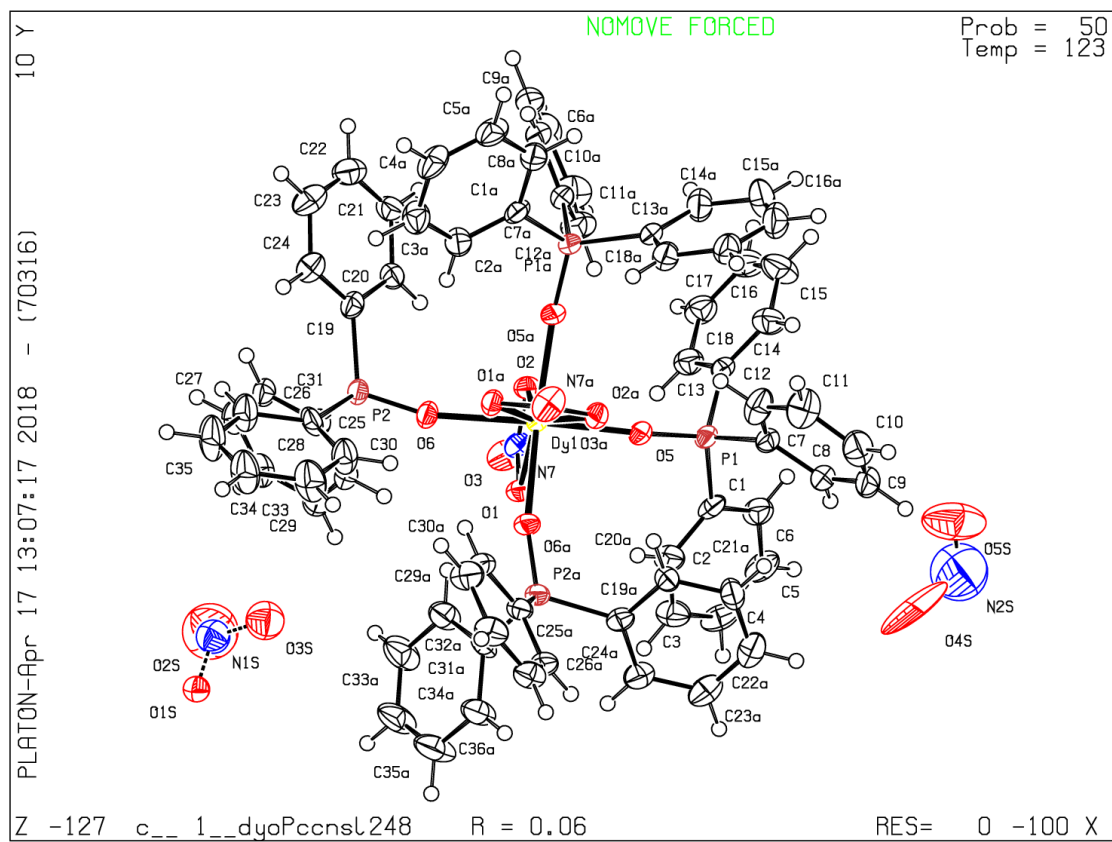

Supplement: s1 [file s1]
