# Supplementary material
Source: MDPI journal article supplement (https://www.mdpi.com/2304-6740/6/2/61)

# checkCIF/PLATON report

Structure factors have been supplied for datablock(s) 4

THIS REPORT IS FOR GUIDANCE ONLY. IF USED AS PART OF A REVIEW PROCEDURE FOR PUBLICATION, IT SHOULD NOT REPLACE THE EXPERTISE OF AN EXPERIENCED CRYSTALLOGRAPHIC REFEREE.

No syntax errors found.      CIF dictionary      Interpreting this report

## Datablock: 4

---

Bond precision:    C-C = 0.0121 Å                      Wavelength=0.71073

Cell:                      a=35.8608(10)              b=43.6134(13)              c=26.6974(7)  
                                alpha=90                      beta=96.885(3)              gamma=90

Temperature:              173 K

|                        | Calculated                              | Reported             |
|------------------------|-----------------------------------------|----------------------|
| Volume                 | 41454(2)                                | 41454(2)             |
| Space group            | C 2/c                                   | C 2/c                |
| Hall group             | -C 2yc                                  | -C 2yc               |
| Moiety formula         | C72 H60 Cl2 Dy O4 P4, Cl<br>[+ solvent] | ?                    |
| Sum formula            | C72 H60 Cl3 Dy O4 P4 [+<br>solvent]     | C72 H60 Cl3 Dy O4 P4 |
| Mr                     | 1381.93                                 | 1381.93              |
| Dx, g cm <sup>-3</sup> | 1.107                                   | 1.107                |
| Z                      | 20                                      | 20                   |
| Mu (mm <sup>-1</sup> ) | 1.113                                   | 1.113                |
| F000                   | 14020.0                                 | 14020.0              |
| F000'                  | 14037.40                                |                      |
| h,k,lmax               | 44,53,32                                | 44,53,32             |
| Nref                   | 40736                                   | 40661                |
| Tmin,Tmax              | 0.677,0.800                             | 0.674,0.799          |
| Tmin'                  | 0.568                                   |                      |

Correction method= # Reported T Limits: Tmin=0.674 Tmax=0.799  
AbsCorr = ANALYTICAL

Data completeness= 0.998                      Theta(max)= 26.000

R(reflections)= 0.0640( 27425)              wR2(reflections)= 0.1776( 40661)

S = 1.022                      Npar= 1915

---

The following ALERTS were generated. Each ALERT has the format

**test-name\_ALERT\_alert-type\_alert-level.**

Click on the hyperlinks for more details of the test.

---

### ● Alert level B

DIFMN02\_ALERT\_2\_B The minimum difference density is < -0.1\*ZMAX\*1.00

\_refine\_diff\_density\_min given = -6.606

Test value = -6.600

PLAT910\_ALERT\_3\_B Missing # of FCF Reflection(s) Below Theta(Min).

20 Note

PLAT973\_ALERT\_2\_B Check Calcd Positive Resid. Density on Dy2

1.71 eA-3

---

### ● Alert level C

DIFMN03\_ALERT\_1\_C The minimum difference density is < -0.1\*ZMAX\*0.75

The relevant atom site should be identified.

DIFMX02\_ALERT\_1\_C The maximum difference density is > 0.1\*ZMAX\*0.75

The relevant atom site should be identified.

|                   |                                                  |                             |               |
|-------------------|--------------------------------------------------|-----------------------------|---------------|
| PLAT097_ALERT_2_C | Large Reported Max.                              | (Positive) Residual Density | 5.51 eA-3     |
| PLAT098_ALERT_2_C | Large Reported Min.                              | (Negative) Residual Density | -6.61 eA-3    |
| PLAT213_ALERT_2_C | Atom C169                                        | has ADP max/min Ratio ..... | 3.3 prolat    |
| PLAT213_ALERT_2_C | Atom C119                                        | has ADP max/min Ratio ..... | 3.1 prolat    |
| PLAT213_ALERT_2_C | Atom C151                                        | has ADP max/min Ratio ..... | 3.2 prolat    |
| PLAT213_ALERT_2_C | Atom C154                                        | has ADP max/min Ratio ..... | 3.8 prolat    |
| PLAT213_ALERT_2_C | Atom C178                                        | has ADP max/min Ratio ..... | 3.5 prolat    |
| PLAT213_ALERT_2_C | Atom C180                                        | has ADP max/min Ratio ..... | 3.1 prolat    |
| PLAT220_ALERT_2_C | Non-Solvent Resd 1                               | C Ueq(max)/Ueq(min) Range   | 4.0 Ratio     |
| PLAT220_ALERT_2_C | Non-Solvent Resd 3                               | C Ueq(max)/Ueq(min) Range   | 3.3 Ratio     |
| PLAT230_ALERT_2_C | Hirshfeld Test Diff for                          | P16 --O8                    | 6.3 s.u.      |
| PLAT234_ALERT_4_C | Large Hirshfeld Difference                       | C138 --C155                 | 0.16 Ang.     |
| PLAT234_ALERT_4_C | Large Hirshfeld Difference                       | C103 --C128                 | 0.17 Ang.     |
| PLAT234_ALERT_4_C | Large Hirshfeld Difference                       | C129 --C165                 | 0.16 Ang.     |
| PLAT234_ALERT_4_C | Large Hirshfeld Difference                       | C135 --C141                 | 0.17 Ang.     |
| PLAT234_ALERT_4_C | Large Hirshfeld Difference                       | C148 --C164                 | 0.17 Ang.     |
| PLAT234_ALERT_4_C | Large Hirshfeld Difference                       | C157 --C171                 | 0.17 Ang.     |
| PLAT241_ALERT_2_C | High 'MainMol' Ueq as Compared to Neighbors of   | C169                        | Check         |
| PLAT241_ALERT_2_C | High 'MainMol' Ueq as Compared to Neighbors of   | C133                        | Check         |
| PLAT241_ALERT_2_C | High 'MainMol' Ueq as Compared to Neighbors of   | O13                         | Check         |
| PLAT241_ALERT_2_C | High 'MainMol' Ueq as Compared to Neighbors of   | C154                        | Check         |
| PLAT241_ALERT_2_C | High 'MainMol' Ueq as Compared to Neighbors of   | C166                        | Check         |
| PLAT241_ALERT_2_C | High 'MainMol' Ueq as Compared to Neighbors of   | C176                        | Check         |
| PLAT241_ALERT_2_C | High 'MainMol' Ueq as Compared to Neighbors of   | C178                        | Check         |
| PLAT241_ALERT_2_C | High 'MainMol' Ueq as Compared to Neighbors of   | C180                        | Check         |
| PLAT242_ALERT_2_C | Low 'MainMol' Ueq as Compared to Neighbors of    | C19                         | Check         |
| PLAT242_ALERT_2_C | Low 'MainMol' Ueq as Compared to Neighbors of    | C72                         | Check         |
| PLAT242_ALERT_2_C | Low 'MainMol' Ueq as Compared to Neighbors of    | C90                         | Check         |
| PLAT242_ALERT_2_C | Low 'MainMol' Ueq as Compared to Neighbors of    | C93                         | Check         |
| PLAT242_ALERT_2_C | Low 'MainMol' Ueq as Compared to Neighbors of    | C125                        | Check         |
| PLAT242_ALERT_2_C | Low 'MainMol' Ueq as Compared to Neighbors of    | C137                        | Check         |
| PLAT242_ALERT_2_C | Low 'MainMol' Ueq as Compared to Neighbors of    | C161                        | Check         |
| PLAT250_ALERT_2_C | Large U3/U1 Ratio for Average U(i,j) Tensor .... |                             | 2.3 Note      |
| PLAT331_ALERT_2_C | Small Average Phenyl C-C Dist                    | C90 -C154                   | 1.37 Ang.     |
| PLAT331_ALERT_2_C | Small Average Phenyl C-C Dist                    | C93 -C132                   | 1.36 Ang.     |
| PLAT331_ALERT_2_C | Small Average Phenyl C-C Dist                    | C103 -C149                  | 1.37 Ang.     |
| PLAT331_ALERT_2_C | Small Average Phenyl C-C Dist                    | C125 -C160                  | 1.37 Ang.     |
| PLAT342_ALERT_3_C | Low Bond Precision on C-C Bonds .....            |                             | 0.01207 Ang.  |
| PLAT905_ALERT_3_C | Negative K value in the Analysis of Variance ... |                             | -3.279 Report |
| PLAT911_ALERT_3_C | Missing FCF Refl Between Thmin & STh/L=          | 0.600                       | 33 Report     |
| PLAT973_ALERT_2_C | Check Calcd Positive Resid. Density on           | Dy1                         | 1.24 eA-3     |
| PLAT978_ALERT_2_C | Number C-C Bonds with Positive Residual Density. |                             | 0 Info        |

---

## ● Alert level G

|                   |                                                    |                |            |
|-------------------|----------------------------------------------------|----------------|------------|
| PLAT066_ALERT_1_G | Predicted and Reported Tmin&Tmax Range Identical   |                | ? Check    |
| PLAT083_ALERT_2_G | SHELXL Second Parameter in WGHT Unusually Large    | 538.92         | Why ?      |
| PLAT232_ALERT_2_G | Hirshfeld Test Diff (M-X) Dy3                      | --08           | . 5.7 s.u. |
| PLAT300_ALERT_4_G | Atom Site Occupancy of Cl1                         | Constrained at | 0.5 Check  |
| PLAT300_ALERT_4_G | Atom Site Occupancy of Cl2                         | Constrained at | 0.5 Check  |
| PLAT300_ALERT_4_G | Atom Site Occupancy of Cl3                         | Constrained at | 0.5 Check  |
| PLAT300_ALERT_4_G | Atom Site Occupancy of Cl4                         | Constrained at | 0.5 Check  |
| PLAT300_ALERT_4_G | Atom Site Occupancy of Cl5                         | Constrained at | 0.5 Check  |
| PLAT302_ALERT_4_G | Anion/Solvent/Minor-Residue Disorder (Resd 4 )     |                | 100% Note  |
| PLAT302_ALERT_4_G | Anion/Solvent/Minor-Residue Disorder (Resd 5 )     |                | 100% Note  |
| PLAT302_ALERT_4_G | Anion/Solvent/Minor-Residue Disorder (Resd 6 )     |                | 100% Note  |
| PLAT302_ALERT_4_G | Anion/Solvent/Minor-Residue Disorder (Resd 7 )     |                | 100% Note  |
| PLAT302_ALERT_4_G | Anion/Solvent/Minor-Residue Disorder (Resd 8 )     |                | 100% Note  |
| PLAT304_ALERT_4_G | Non-Integer Number of Atoms in ..... Resd 4        |                | 0.50 Check |
| PLAT304_ALERT_4_G | Non-Integer Number of Atoms in ..... Resd 5        |                | 0.50 Check |
| PLAT304_ALERT_4_G | Non-Integer Number of Atoms in ..... Resd 6        |                | 0.50 Check |
| PLAT304_ALERT_4_G | Non-Integer Number of Atoms in ..... Resd 7        |                | 0.50 Check |
| PLAT304_ALERT_4_G | Non-Integer Number of Atoms in ..... Resd 8        |                | 0.50 Check |
| PLAT606_ALERT_4_G | VERY LARGE Solvent Accessible VOID(S) in Structure |                | ! Info     |
| PLAT794_ALERT_5_G | Tentative Bond Valency for Dy1 (III)               | .              | 3.27 Info  |
| PLAT794_ALERT_5_G | Tentative Bond Valency for Dy2 (III)               | .              | 3.20 Info  |
| PLAT794_ALERT_5_G | Tentative Bond Valency for Dy3 (III)               | .              | 3.23 Info  |
| PLAT869_ALERT_4_G | ALERTS Related to the Use of SQUEEZE Suppressed    |                | ! Info     |
| PLAT912_ALERT_4_G | Missing # of FCF Reflections Above STh/L= 0.600    |                | 22 Note    |
| PLAT913_ALERT_3_G | Missing # of Very Strong Reflections in FCF ....   |                | 2 Note     |
| PLAT933_ALERT_2_G | Number of OMIT Records in Embedded .res File ...   |                | 9 Note     |

- 
- 0 **ALERT level A** = Most likely a serious problem - resolve or explain  
3 **ALERT level B** = A potentially serious problem, consider carefully  
44 **ALERT level C** = Check. Ensure it is not caused by an omission or oversight  
26 **ALERT level G** = General information/check it is not something unexpected
- 3 ALERT type 1 CIF construction/syntax error, inconsistent or missing data  
38 ALERT type 2 Indicator that the structure model may be wrong or deficient  
5 ALERT type 3 Indicator that the structure quality may be low  
24 ALERT type 4 Improvement, methodology, query or suggestion  
3 ALERT type 5 Informative message, check
- 
-

It is advisable to attempt to resolve as many as possible of the alerts in all categories. Often the minor alerts point to easily fixed oversights, errors and omissions in your CIF or refinement strategy, so attention to these fine details can be worthwhile. In order to resolve some of the more serious problems it may be necessary to carry out additional measurements or structure refinements. However, the purpose of your study may justify the reported deviations and the more serious of these should normally be commented upon in the discussion or experimental section of a paper or in the "special\_details" fields of the CIF. checkCIF was carefully designed to identify outliers and unusual parameters, but every test has its limitations and alerts that are not important in a particular case may appear. Conversely, the absence of alerts does not guarantee there are no aspects of the results needing attention. It is up to the individual to critically assess their own results and, if necessary, seek expert advice.

### **Publication of your CIF in IUCr journals**

A basic structural check has been run on your CIF. These basic checks will be run on all CIFs submitted for publication in IUCr journals (*Acta Crystallographica*, *Journal of Applied Crystallography*, *Journal of Synchrotron Radiation*); however, if you intend to submit to *Acta Crystallographica Section C* or *E* or *IUCrData*, you should make sure that full publication checks are run on the final version of your CIF prior to submission.

### **Publication of your CIF in other journals**

Please refer to the *Notes for Authors* of the relevant journal for any special instructions relating to CIF submission.

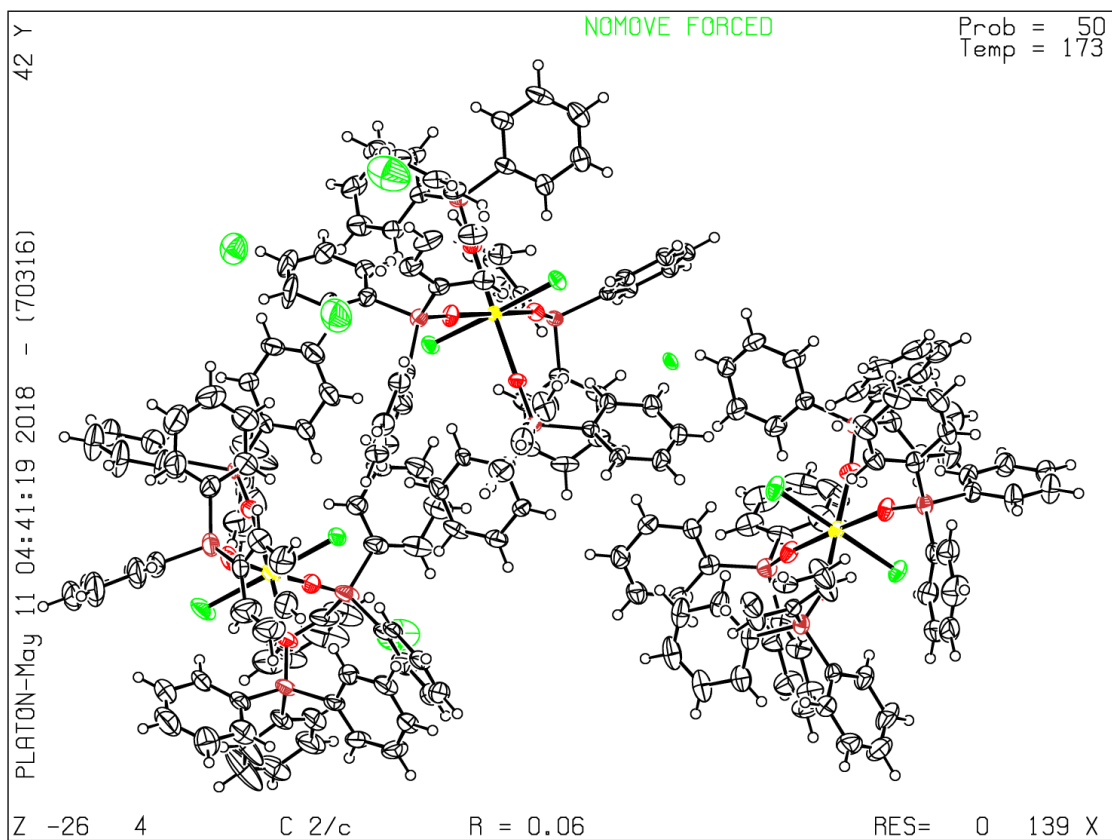

Supplement: s1 [file s1]
