# Supplementary material
Source: MDPI journal article supplement (https://www.mdpi.com/2304-6740/6/2/61)

## checkCIF/PLATON report

You have not supplied any structure factors. As a result the full set of tests cannot be run.

THIS REPORT IS FOR GUIDANCE ONLY. IF USED AS PART OF A REVIEW PROCEDURE FOR PUBLICATION, IT SHOULD NOT REPLACE THE EXPERTISE OF AN EXPERIENCED CRYSTALLOGRAPHIC REFEREE.

No syntax errors found.      CIF dictionary      Interpreting this report

### Datablock: c\_\_dycomp~1\_\_dyop~2\_p21c

---

Bond precision:    C-C = 0.0043 Å                      Wavelength=0.71073

Cell:                      a=19.684(4)              b=15.211(3)              c=34.082(7)  
                            alpha=90              beta=95.91(3)              gamma=90  
Temperature:              123 K

|                | Calculated                          | Reported                   |
|----------------|-------------------------------------|----------------------------|
| Volume         | 10150(4)                            | 10150(3)                   |
| Space group    | P 21/c                              | P2(1)/c                    |
| Hall group     | -P 2ybc                             | ?                          |
| Moiety formula | 2(C54 H45 Cl3 Dy O3 P3),<br>C3 H6 O | ?                          |
| Sum formula    | C111 H96 Cl6 Dy2 O7 P6              | C55.50 H48 Cl3 Dy O3.50 P3 |
| Mr             | 2265.40                             | 1132.70                    |
| Dx,g cm-3      | 1.482                               | 1.482                      |
| Z              | 4                                   | 8                          |
| Mu (mm-1)      | 1.769                               | 1.769                      |
| F000           | 4568.0                              | 4568.0                     |
| F000'          | 4573.81                             |                            |
| h,k,lmax       | 25,20,44                            | 25,19,44                   |
| Nref           | 24284                               | 24163                      |
| Tmin,Tmax      | 0.432,0.702                         | 0.432,0.702                |
| Tmin'          | 0.409                               |                            |

Correction method= # Reported T Limits: Tmin=0.432 Tmax=0.702  
AbsCorr = MULTI-SCAN

Data completeness= 0.995                      Theta(max)= 27.910

R(reflections)= 0.0322( 23070)              wR2(reflections)= 0.0826( 24163)

S = 1.076                      Npar= 1227

---

The following ALERTS were generated. Each ALERT has the format

**test-name\_ALERT\_alert-type\_alert-level.**

Click on the hyperlinks for more details of the test.

### ● Alert level C

|                   |                           |                                 |           |
|-------------------|---------------------------|---------------------------------|-----------|
| PLAT220_ALERT_2_C | Non-Solvent Resd 1 C      | Ueq(max)/Ueq(min) Range         | 4.3 Ratio |
| PLAT241_ALERT_2_C | High 'MainMol'            | Ueq as Compared to Neighbors of | C39 Check |
| PLAT242_ALERT_2_C | Low 'MainMol'             | Ueq as Compared to Neighbors of | C37 Check |
| PLAT242_ALERT_2_C | Low 'MainMol'             | Ueq as Compared to Neighbors of | C40 Check |
| PLAT411_ALERT_2_C | Short Inter H...H Contact | H14 ..H86                       | 2.10 Ang. |

### ● Alert level G

|                   |                                                  |                 |             |
|-------------------|--------------------------------------------------|-----------------|-------------|
| PLAT005_ALERT_5_G | No Embedded Refinement Details Found             | in the CIF      | Please Do ! |
| PLAT045_ALERT_1_G | Calculated and Reported Z Differ by a Factor ... |                 | 0.50 Check  |
| PLAT066_ALERT_1_G | Predicted and Reported Tmin&Tmax Range Identical |                 | ? Check     |
| PLAT083_ALERT_2_G | SHELXL Second Parameter in WGHT                  | Unusually Large | 21.35 Why ? |
| PLAT093_ALERT_1_G | No s.u.'s on H-positions, Refinement Reported as |                 | mixed Check |
| PLAT232_ALERT_2_G | Hirshfeld Test Diff (M-X) Dy1                    | --Cl1 .         | 5.5 s.u.    |
| PLAT232_ALERT_2_G | Hirshfeld Test Diff (M-X) Dy1                    | --Cl3 .         | 6.3 s.u.    |
| PLAT232_ALERT_2_G | Hirshfeld Test Diff (M-X) Dy2                    | --Cl4 .         | 8.3 s.u.    |
| PLAT232_ALERT_2_G | Hirshfeld Test Diff (M-X) Dy2                    | --Cl6 .         | 7.3 s.u.    |
| PLAT300_ALERT_4_G | Atom Site Occupancy of O1'                       | Constrained at  | 0.5 Check   |
| PLAT300_ALERT_4_G | Atom Site Occupancy of ClS'                      | Constrained at  | 0.5 Check   |
| PLAT300_ALERT_4_G | Atom Site Occupancy of C2S'                      | Constrained at  | 0.5 Check   |
| PLAT300_ALERT_4_G | Atom Site Occupancy of C4'                       | Constrained at  | 0.5 Check   |
| PLAT300_ALERT_4_G | Atom Site Occupancy of H1S4                      | Constrained at  | 0.5 Check   |
| PLAT300_ALERT_4_G | Atom Site Occupancy of H1S5                      | Constrained at  | 0.5 Check   |
| PLAT300_ALERT_4_G | Atom Site Occupancy of H1S6                      | Constrained at  | 0.5 Check   |
| PLAT300_ALERT_4_G | Atom Site Occupancy of H2S4                      | Constrained at  | 0.5 Check   |
| PLAT300_ALERT_4_G | Atom Site Occupancy of H2S5                      | Constrained at  | 0.5 Check   |
| PLAT300_ALERT_4_G | Atom Site Occupancy of H2S6                      | Constrained at  | 0.5 Check   |
| PLAT300_ALERT_4_G | Atom Site Occupancy of O1S                       | Constrained at  | 0.5 Check   |
| PLAT300_ALERT_4_G | Atom Site Occupancy of ClS                       | Constrained at  | 0.5 Check   |
| PLAT300_ALERT_4_G | Atom Site Occupancy of C2S                       | Constrained at  | 0.5 Check   |
| PLAT300_ALERT_4_G | Atom Site Occupancy of C3S                       | Constrained at  | 0.5 Check   |
| PLAT300_ALERT_4_G | Atom Site Occupancy of H1S1                      | Constrained at  | 0.5 Check   |
| PLAT300_ALERT_4_G | Atom Site Occupancy of H1S2                      | Constrained at  | 0.5 Check   |
| PLAT300_ALERT_4_G | Atom Site Occupancy of H1S3                      | Constrained at  | 0.5 Check   |
| PLAT300_ALERT_4_G | Atom Site Occupancy of H2S1                      | Constrained at  | 0.5 Check   |
| PLAT300_ALERT_4_G | Atom Site Occupancy of H2S2                      | Constrained at  | 0.5 Check   |
| PLAT300_ALERT_4_G | Atom Site Occupancy of H2S3                      | Constrained at  | 0.5 Check   |
| PLAT302_ALERT_4_G | Anion/Solvent/Minor-Residue Disorder (Resd 3 )   |                 | 100% Note   |
| PLAT302_ALERT_4_G | Anion/Solvent/Minor-Residue Disorder (Resd 4 )   |                 | 100% Note   |
| PLAT380_ALERT_4_G | Incorrectly? Oriented X(sp2)-Methyl Moiety ..... |                 | C2S Check   |
| PLAT720_ALERT_4_G | Number of Unusual/Non-Standard Labels .....      |                 | 14 Note     |
| PLAT794_ALERT_5_G | Tentative Bond Valency for Dy1 (III)             |                 | 3.21 Info   |
| PLAT899_ALERT_4_G | SHELXL97 is Deprecated and Succeeded by SHELXL   |                 | 2018 Note   |

- 0 **ALERT level A** = Most likely a serious problem - resolve or explain  
 0 **ALERT level B** = A potentially serious problem, consider carefully  
 5 **ALERT level C** = Check. Ensure it is not caused by an omission or oversight  
 35 **ALERT level G** = General information/check it is not something unexpected
- 3 **ALERT type 1** CIF construction/syntax error, inconsistent or missing data  
 10 **ALERT type 2** Indicator that the structure model may be wrong or deficient  
 0 **ALERT type 3** Indicator that the structure quality may be low  
 25 **ALERT type 4** Improvement, methodology, query or suggestion  
 2 **ALERT type 5** Informative message, check

---

---

It is advisable to attempt to resolve as many as possible of the alerts in all categories. Often the minor alerts point to easily fixed oversights, errors and omissions in your CIF or refinement strategy, so attention to these fine details can be worthwhile. In order to resolve some of the more serious problems it may be necessary to carry out additional measurements or structure refinements. However, the purpose of your study may justify the reported deviations and the more serious of these should normally be commented upon in the discussion or experimental section of a paper or in the "special\_details" fields of the CIF. checkCIF was carefully designed to identify outliers and unusual parameters, but every test has its limitations and alerts that are not important in a particular case may appear. Conversely, the absence of alerts does not guarantee there are no aspects of the results needing attention. It is up to the individual to critically assess their own results and, if necessary, seek expert advice.

### **Publication of your CIF in IUCr journals**

A basic structural check has been run on your CIF. These basic checks will be run on all CIFs submitted for publication in IUCr journals (*Acta Crystallographica*, *Journal of Applied Crystallography*, *Journal of Synchrotron Radiation*); however, if you intend to submit to *Acta Crystallographica Section C* or *E* or *IUCrData*, you should make sure that full publication checks are run on the final version of your CIF prior to submission.

### **Publication of your CIF in other journals**

Please refer to the *Notes for Authors* of the relevant journal for any special instructions relating to CIF submission.

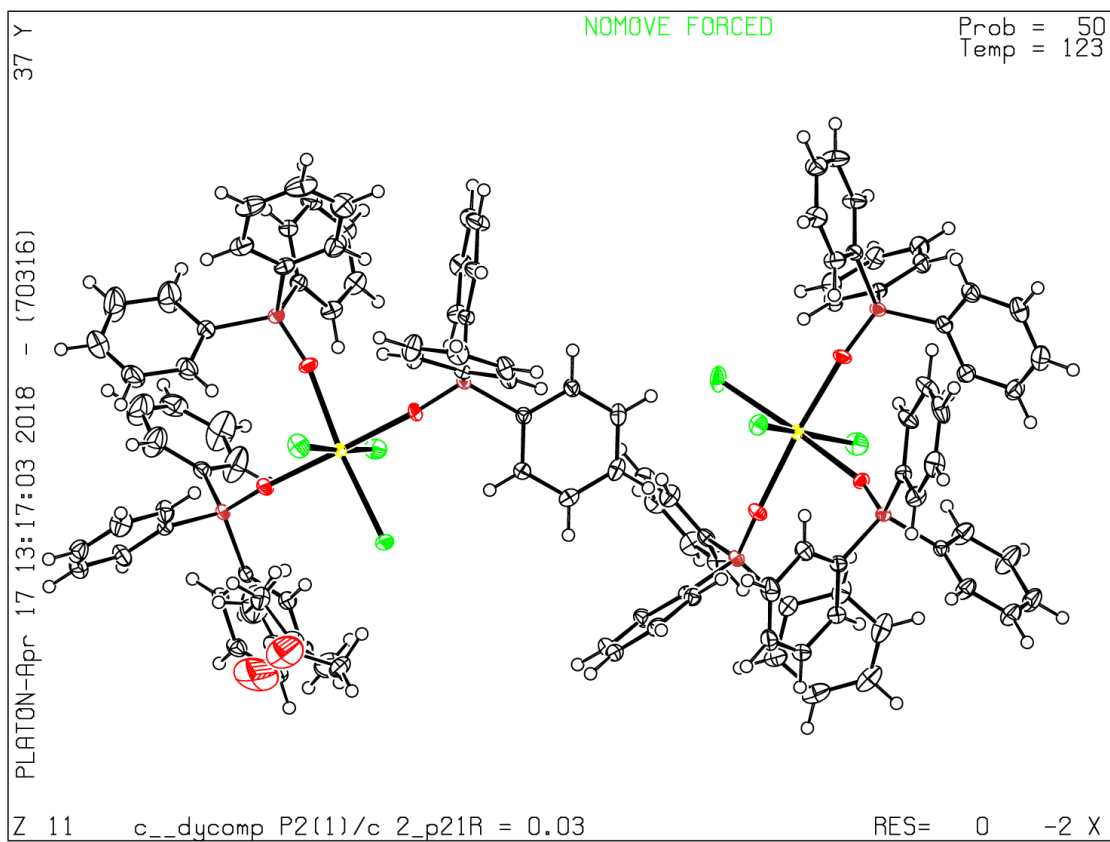

Supplement: s1 [file s1]
