# Supplementary material
Source: MDPI journal article supplement (https://www.mdpi.com/2304-6740/6/2/61)
Supplement: s1 [file s1]

# Mononuclear Dysprosium(III) complexes with triphenylphosphine oxide ligands: controlling the coordination environment and magnetic anisotropy

Stuart K. Langley<sup>1\*</sup>, Kuduva R. Vignesh<sup>2</sup>, Kerey Holton<sup>1</sup>, Sophie Benjamin<sup>3</sup>, Gary Hix<sup>4</sup>, Wasinee Phonsri<sup>5</sup>, Boujemaa Moubaraki<sup>5</sup>, Keith S. Murray<sup>5\*</sup> and Gopalan Rajaraman<sup>2\*</sup>

**Table S1.** Shape measures of the 9- and 8-coordinate of Dy coordination polyhedra in **1** and **2**, respectively.

| Polyhedron <sup>a</sup> | Complex 1   | Polyhedron <sup>b</sup> | Complex 2   |
|-------------------------|-------------|-------------------------|-------------|
| EP-9                    | 33.80       | OP-8                    | 28.63       |
| OPY-9                   | 23.01       | HPY-8                   | 24.38       |
| HBPY-9                  | 17.60       | HBPY-8                  | 12.93       |
| JTC-9                   | 14.29       | CU-8                    | 11.85       |
| JCCU-9                  | 10.63       | SAPR-8                  | 4.94        |
| CCU-9                   | 9.56        | TDD-8                   | <b>2.49</b> |
| JCSAPR-9                | 2.69        | JGBF-8                  | 9.55        |
| CSAPR-9                 | <b>1.94</b> | JETBPY-8                | 24.94       |
| JTCTPR-9                | 3.37        | JBTPR-8                 | 3.90        |
| HH-9                    | 9.78        | BTPR-8                  | 3.67        |
| MFF-9                   | 1.93        | JSD-8                   | 2.45        |
|                         |             | TT-8                    | 12.68       |
|                         |             | ETBPY-8                 | 22.56       |

<sup>a</sup>Abbreviations: EP-9 Enneagon; OPY-9 Octagonal pyramid; HBPY-9 Heptagonal bipyramid; JTC-9 Triangular cupola = trivacant cuboctahedron; JCCU-9 Capped cube (Elongated square pyramid); CCU-9 Capped cube; JCSAPR-9 Capped sq. antiprism (Gyroelongated square pyramid) ; CSAPR-9 Capped square antiprism; JTCTPR-9 Tricapped trigonal prism; TCTPR-9 Tricapped trigonal prism; JTDIC-9 Tridiminished icosahedron; HH-9 Hula-hoop; MFF-9 Muffin

<sup>b</sup>Abbreviations: OP-8, octagon; HPY-8, heptagonal pyramid; HBPY-8, hexagonal bipyramid; CU-8, cube; SAPR-8, square antiprism; TDD-8, triangular dodecahedron; JGBF-8, Johnson gyrobifastigium; JETBPY-8, Johnson elongated triangular bipyramid; JBTPR-8, Johnson biaugmented trigonal prism; BTPR-8, biaugmented trigonal prism; JSD-8, Johnson snub diphendoid; TT-8, triakis tetrahedron; ETBPY-8, elongated trigonal bipyramid.

**Table S2.** Shape measures of the 6-coordinate Dy coordination polyhedra in **3-5**.

| Polyhedron <sup>c</sup>                                                                                                                        | Complex 3   | Complex 4   | Complex 5   |
|------------------------------------------------------------------------------------------------------------------------------------------------|-------------|-------------|-------------|
| HP-6                                                                                                                                           | 33.46       | 33.05       | 33.12       |
| PPY-6                                                                                                                                          | 27.81       | 28.86       | 29.19       |
| OC-6                                                                                                                                           | <b>0.63</b> | <b>0.60</b> | <b>0.59</b> |
| TPR-6                                                                                                                                          | 15.11       | 16.24       | 16.56       |
| JPPY-6                                                                                                                                         | 31.34       | 31.94       | 32.28       |
| <sup>c</sup> Abbreviations: HP-6 Hexagon; PPY-6 Pentagonal pyramid; OC-6 Octahedron; TPR-6 Trigonal prism ; JPPY-5 Johnson pentagonal pyramid. |             |             |             |

**Table S3.** Bond length data (Å) for **1 – 5**.

| <b>1</b> |            | <b>2</b> |          | <b>3</b> |            | <b>3'</b> |            |
|----------|------------|----------|----------|----------|------------|-----------|------------|
| Dy-O3    | 2.2778(14) | Dy-O5'   | 2.247(4) | Dy1-O1   | 2.2249(18) | Dy2-O6    | 2.2436(18) |
| Dy-O2    | 2.2830(15) | Dy-O5    | 2.247(4) | Dy1-O3   | 2.2351(18) | Dy2-O5    | 2.2577(17) |
| Dy-O1    | 2.2951(14) | Dy-O6'   | 2.284(4) | Dy1-O2   | 2.2876(18) | Dy2-O4    | 2.2617(18) |
| Dy-O10   | 2.4388(15) | Dy-O6    | 2.284(4) | Dy1-Cl2  | 2.6139(7)  | Dy2-Cl5   | 2.5991(8)  |
| Dy-O4    | 2.4537(17) | Dy-O1'   | 2.451(4) | Dy1-Cl1  | 2.6328(10) | Dy2-Cl4   | 2.6297(18) |
| Dy-O7    | 2.4631(17) | Dy-O1    | 2.451(4) | Dy1-Cl3  | 2.6342(10) | Dy2-Cl6   | 2.6470(9)  |
| Dy-O5    | 2.4814(17) | Dy-O2'   | 2.481(4) |          |            |           |            |
| Dy-O8    | 2.4877(17) | Dy-O2    | 2.481(4) |          |            |           |            |
| Dy-O11   | 2.5127(16) |          |          |          |            |           |            |

| <b>4</b> |          | <b>4'</b> |             | <b>4''</b> |            |
|----------|----------|-----------|-------------|------------|------------|
| Dy1-O9'  | 2.231(4) | Dy2-O4    | 2.231(4)    | Dy3-O13    | 2.216(5)   |
| Dy1-O9   | 2.231(4) | Dy2-O6    | 2.245(4)    | Dy3-O17    | 2.228(5)   |
| Dy1-O11' | 2.246(4) | Dy2-O5    | 2.251(4)    | Dy3-O8     | 2.233(6)   |
| Dy1-O11  | 2.246(4) | Dy2-O7    | 2.251(4)    | Dy3-O15    | 2.265(7)   |
| Dy1-Cl8  | 2.601(2) | Dy2-Cl7   | 2.6194(15)  | Dy3-Cl9    | 2.6164(16) |
| Dy1-Cl11 | 2.620(2) | Dy2-Cl14  | 2.62221(15) | Dy3-Cl19   | 2.6444(19) |

| <b>5</b> |            | <b>5'</b> |            |
|----------|------------|-----------|------------|
| Dy1-O11  | 2.2245(19) | Dy2-O8    | 2.231(2)   |
| Dy1-O5   | 2.230(2)   | Dy2-O10   | 2.243(2)   |
| Dy1-O9   | 2.2424(19) | Dy2-O6    | 2.244(2)   |
| Dy1-O7   | 2.244(2)   | Dy2-O12   | 2.2519(19) |
| Dy1-Cl5  | 2.6138(7)  | Dy2-Cl6   | 2.6170(7)  |
| Dy1-Cl3  | 2.6302(7)  | Dy2-Cl4   | 2.6258(7)  |

Complex **3**, **4** and **5** have two, three and two unique metal ions in the asymmetric unit, respectively.

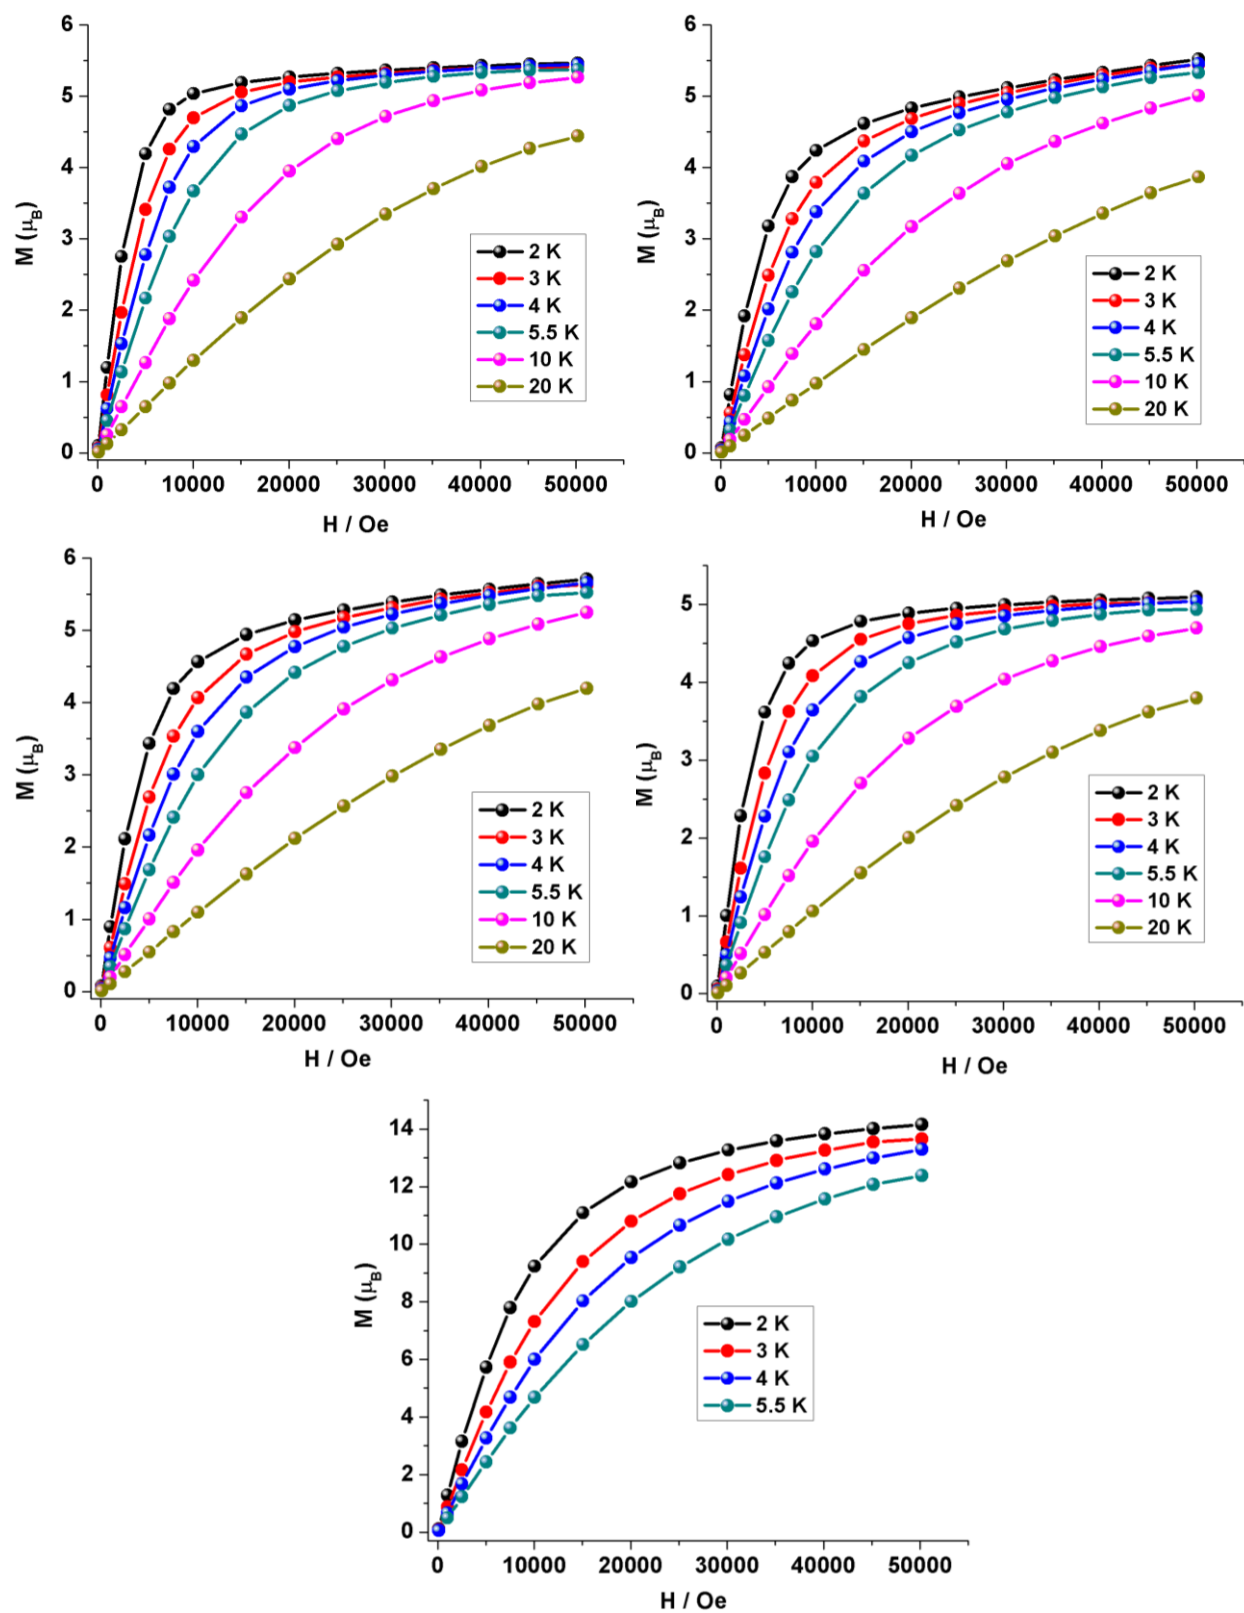

**Figure S1.** Plots of  $M$  versus  $H$  isotherms for complexes 1 (top left), 2 (top right), 3 (middle left), 4 (middle right) and 5 (bottom) at 2, 3, 4, 5.5, 10 and 20 K.

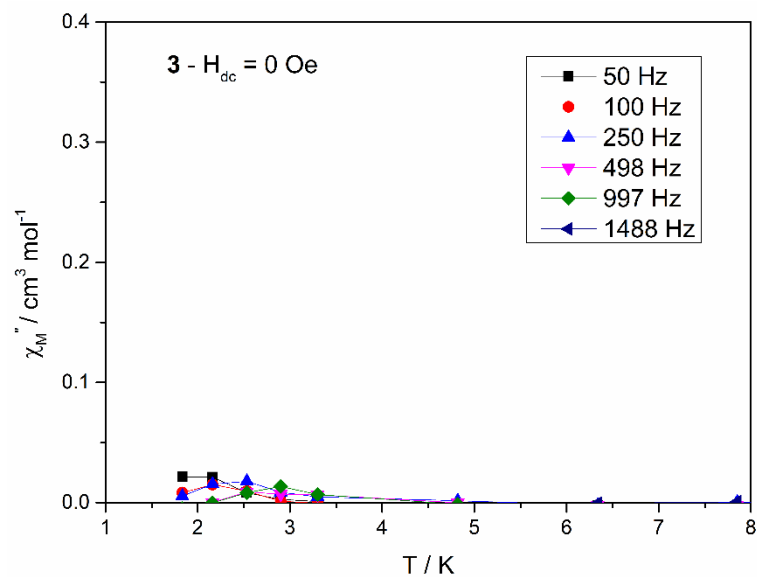

Figure S2. Plot of  $\chi''$  versus  $T$  for complex 3 ( $H_{dc} = 0$  Oe).

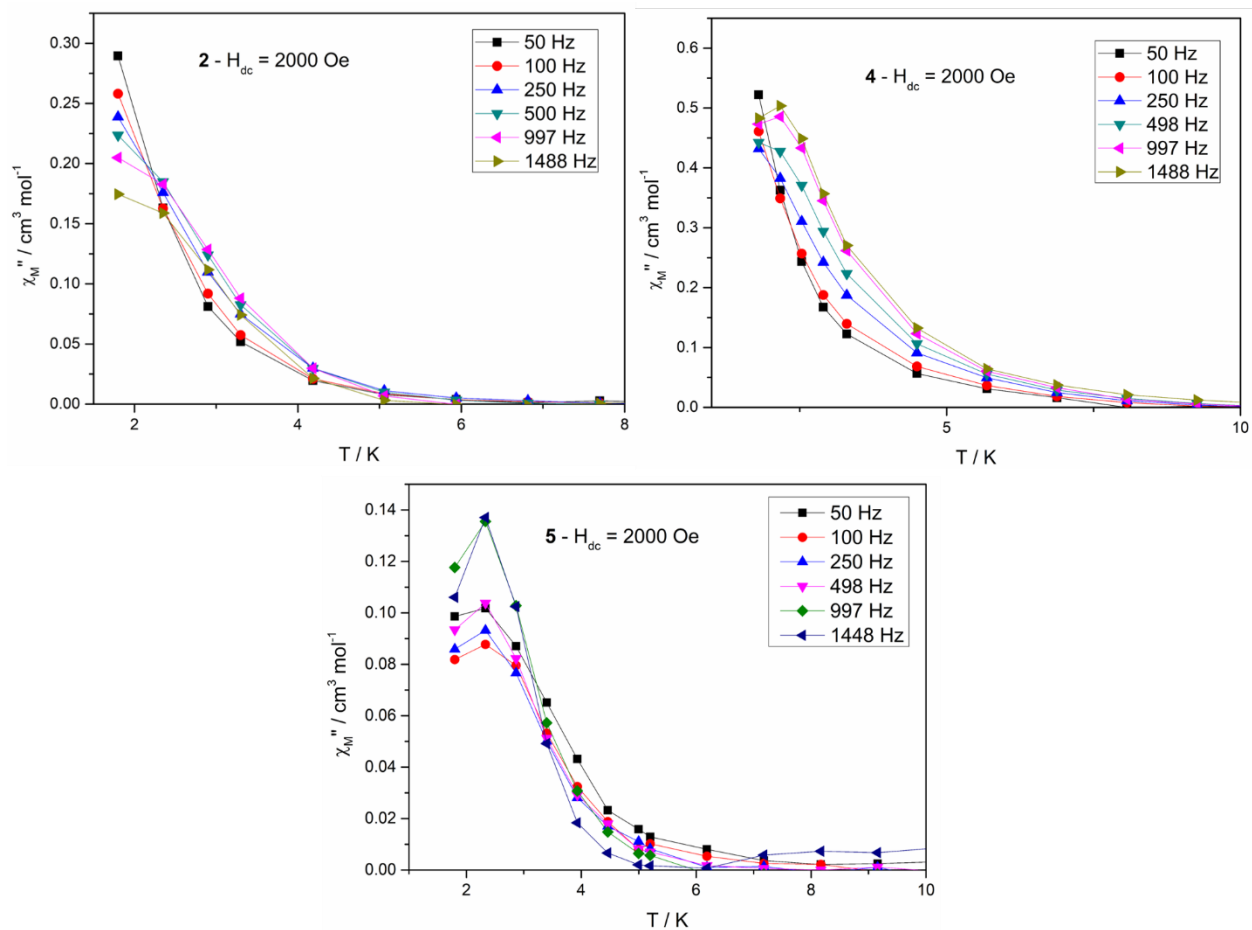

Figure S3. Plots of  $\chi''$  versus  $T$  for complexes 2 (top left), 4 (top right) and 5 (bottom) ( $H_{dc} = 2000$  Oe).

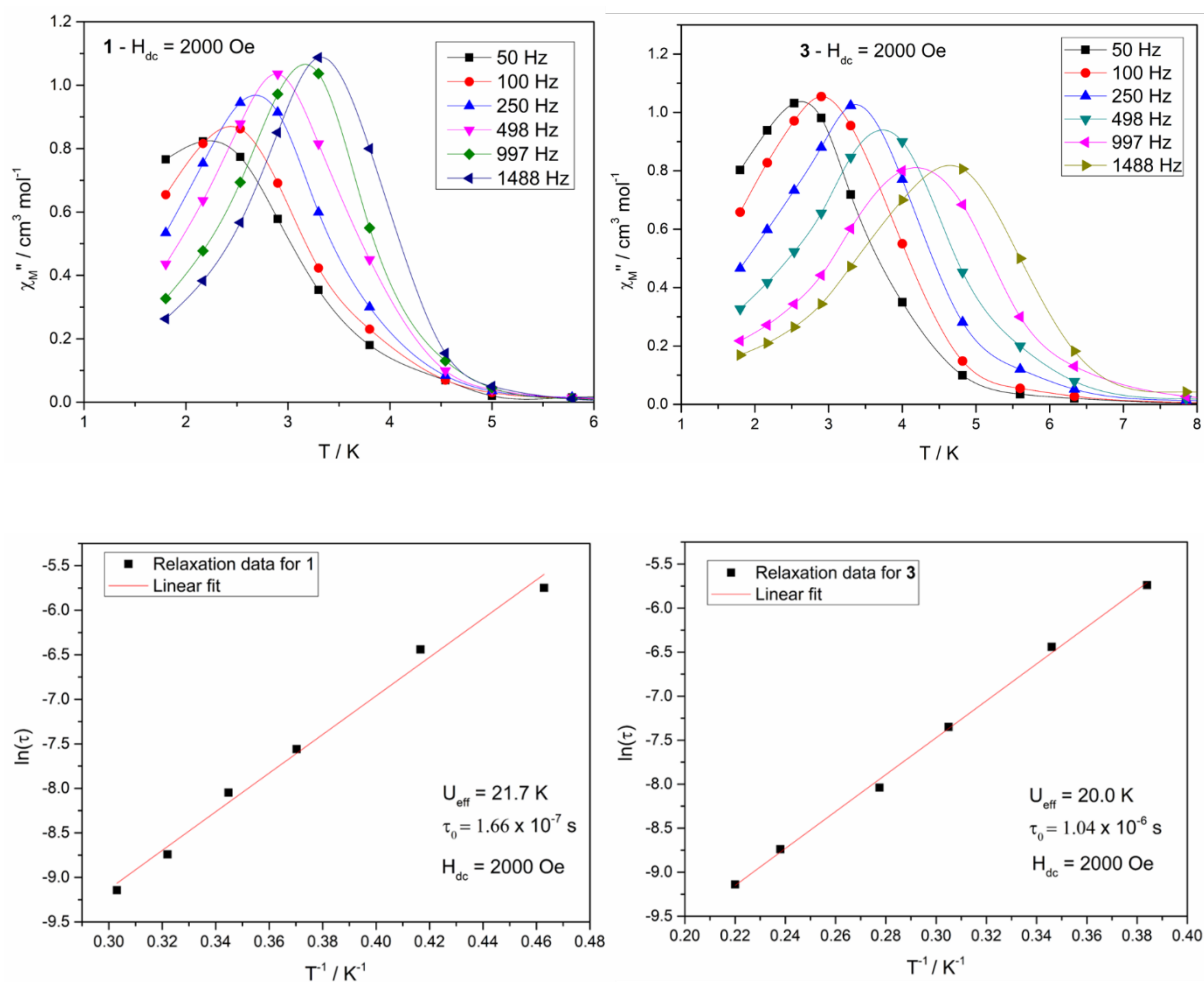

**Figure S4.**  $\chi_M''$  vs  $T$  for **1** (top left) and **3** (top right),  $H_{dc} = 2000 \text{ Oe}$  and  $\ln(\tau)$  vs  $T^{-1}$  plots for **1** (bottom left) and **3** (bottom right) and **3**.

**Table S4.** The  $g$ -tensor for the eight lowest Kramer's doublets in 1–5.

| KDs |       | 1       | 2       | 3       | 4       | 5       |
|-----|-------|---------|---------|---------|---------|---------|
| 1   | $g_x$ | 0.2287  | 11.9707 | 0.1352  | 2.1939  | 1.2982  |
|     | $g_y$ | 0.3597  | 8.0477  | 2.9545  | 5.9830  | 2.8906  |
|     | $g_z$ | 19.6158 | 0.7205  | 16.6803 | 11.6635 | 15.6449 |
| 2   | $g_x$ | 1.2424  | 11.2464 | 1.8559  | 11.5699 | 2.2349  |
|     | $g_y$ | 2.5797  | 7.5039  | 3.3976  | 6.5171  | 4.2730  |
|     | $g_z$ | 14.5400 | 0.9077  | 13.9374 | 1.1546  | 12.8135 |
| 3   | $g_x$ | 1.3167  | 1.7696  | 0.9956  | 1.1166  | 1.4306  |
|     | $g_y$ | 1.7468  | 2.8407  | 1.8251  | 1.7863  | 5.4318  |
|     | $g_z$ | 14.7510 | 9.4798  | 15.6905 | 15.3274 | 11.4788 |
| 4   | $g_x$ | 2.4863  | 2.2134  | 6.3739  | 8.3977  | 8.5502  |
|     | $g_y$ | 4.8001  | 2.4132  | 6.5877  | 7.8569  | 7.7033  |
|     | $g_z$ | 11.7698 | 9.5985  | 9.3806  | 6.2360  | 6.2214  |
| 5   | $g_x$ | 2.9324  | 0.4623  | 0.3279  | 4.2247  | 4.6444  |
|     | $g_y$ | 4.8141  | 1.53721 | 1.8457  | 5.0178  | 4.7493  |
|     | $g_z$ | 10.5919 | 5.6883  | 9.7869  | 9.7629  | 8.9256  |
| 6   | $g_x$ | 0.0307  | 0.5387  | 3.3439  | 0.6628  | 0.7248  |
|     | $g_y$ | 0.5252  | 3.0373  | 5.7538  | 4.0157  | 4.8613  |
|     | $g_z$ | 16.8932 | 12.4774 | 8.5144  | 10.1471 | 9.7919  |
| 7   | $g_x$ | 1.2355  | 5.7461  | 1.2156  | 1.1354  | 1.5209  |
|     | $g_y$ | 2.4115  | 4.3488  | 4.8003  | 4.7161  | 5.4493  |
|     | $g_z$ | 14.5844 | 2.2037  | 11.0804 | 10.4895 | 10.6602 |
| 8   | $g_x$ | 0.6562  | 1.9784  | 3.0217  | 1.0700  | 12.1916 |
|     | $g_y$ | 0.8414  | 6.0334  | 4.0270  | 4.8155  | 6.2188  |
|     | $g_z$ | 17.9767 | 13.7132 | 13.0809 | 14.3456 | 0.2044  |

**Table S5.** RASSI energies of the lowest spin-orbit states (cm<sup>-1</sup>) of each Dy center in complexes **1–5**.

| 1         | 2         | 3         | 4         | 5         |
|-----------|-----------|-----------|-----------|-----------|
| 0.000     | 0.000     | 0.000     | 0.000     | 0.000     |
| 48.293    | 7.044     | 30.526    | 31.509    | 31.637    |
| 88.199    | 125.787   | 64.225    | 53.241    | 52.888    |
| 148.413   | 148.122   | 145.911   | 148.318   | 153.478   |
| 184.968   | 185.368   | 276.868   | 294.835   | 302.001   |
| 212.832   | 231.406   | 307.394   | 322.282   | 331.027   |
| 265.940   | 274.568   | 343.395   | 364.666   | 374.866   |
| 333.096   | 312.126   | 367.989   | 394.842   | 396.745   |
| 2998.457  | 3042.847  | 3080.513  | 3096.466  | 3096.548  |
| 3078.931  | 3060.782  | 3112.342  | 3104.176  | 3119.985  |
| 3111.834  | 3127.015  | 3132.055  | 3134.481  | 3134.512  |
| 3140.086  | 3139.493  | 3177.059  | 3191.327  | 3194.629  |
| 3160.756  | 3155.275  | 3194.545  | 3202.727  | 3211.924  |
| 3193.845  | 3189.750  | 3206.441  | 3216.517  | 3221.424  |
| 3235.516  | 3202.365  | 3228.202  | 3245.340  | 3248.996  |
| 5599.010  | 5630.039  | 5691.628  | 5696.105  | 5702.701  |
| 5649.963  | 5669.236  | 5709.323  | 5715.211  | 5722.561  |
| 5691.919  | 5686.501  | 5723.030  | 5738.878  | 5741.366  |
| 5703.541  | 5716.469  | 5737.866  | 5744.456  | 5748.919  |
| 5767.678  | 5740.660  | 5756.134  | 5763.637  | 5769.227  |
| 5810.452  | 5777.521  | 5774.769  | 5785.472  | 5789.729  |
| 7796.391  | 7801.743  | 7859.772  | 7863.653  | 7868.423  |
| 7825.211  | 7850.964  | 7879.909  | 7884.833  | 7892.419  |
| 7864.307  | 7877.787  | 7893.881  | 7906.504  | 7907.355  |
| 7929.509  | 7917.383  | 7907.619  | 7911.213  | 7917.334  |
| 7981.340  | 7946.275  | 7983.165  | 7997.945  | 8003.166  |
| 9513.605  | 9539.161  | 9552.260  | 9558.796  | 9563.490  |
| 9554.117  | 9552.849  | 9559.642  | 9563.966  | 9568.029  |
| 9573.391  | 9559.864  | 9590.834  | 9598.367  | 9603.230  |
| 9579.636  | 9571.703  | 9628.687  | 9634.759  | 9638.898  |
| 9594.790  | 9602.521  | 9638.516  | 9647.948  | 9652.464  |
| 9620.655  | 9618.208  | 9663.221  | 9670.989  | 9675.726  |
| 9652.960  | 9660.936  | 9675.302  | 9686.175  | 9691.547  |
| 9672.843  | 9688.985  | 9684.070  | 9698.200  | 9703.282  |
| 9708.340  | 9704.855  | 9702.453  | 9715.652  | 9722.278  |
| 9772.469  | 9725.864  | 9807.798  | 9832.574  | 9839.002  |
| 10952.922 | 10987.386 | 11015.531 | 11025.463 | 11030.321 |
| 11058.322 | 11027.511 | 11043.610 | 11043.072 | 11048.097 |
| 11134.713 | 11136.014 | 11169.879 | 11187.167 | 11191.814 |
| 11733.862 | 11733.892 | 11771.363 | 11782.533 | 11787.738 |
| 11768.627 | 11763.598 | 11782.312 | 11794.467 | 11799.370 |
| 11788.934 | 11772.959 | 11814.185 | 11827.755 | 11832.846 |
| 11794.146 | 11803.706 | 11825.932 | 11840.309 | 11846.341 |
| 11816.730 | 11819.779 | 11863.263 | 11881.048 | 11886.820 |
| 13517.738 | 13496.855 | 13496.664 | 13503.401 | 13507.331 |

|           |           |           |           |           |
|-----------|-----------|-----------|-----------|-----------|
| 13548.786 | 13543.498 | 13601.424 | 13614.623 | 13620.234 |
| 13565.978 | 13590.596 | 13609.008 | 13624.123 | 13629.136 |
| 13603.310 | 13599.997 | 13641.980 | 13658.848 | 13664.892 |
| 14919.702 | 14903.911 | 14914.801 | 14923.320 | 14927.600 |
| 14946.750 | 14950.046 | 14993.825 | 15008.197 | 15013.455 |
| 14963.838 | 14971.180 | 14997.168 | 15011.388 | 15016.736 |
| 15929.484 | 15929.147 | 15962.926 | 15976.192 | 15981.560 |
| 15938.919 | 15939.403 | 15965.609 | 15979.339 | 15984.195 |
| 16528.153 | 16526.815 | 16553.742 | 16566.604 | 16571.520 |
| 38806.558 | 38830.069 | 38872.599 | 38886.622 | 38894.574 |
| 38861.964 | 38870.608 | 38883.636 | 38898.783 | 38904.141 |
| 38905.342 | 38900.112 | 38896.196 | 38911.604 | 38914.102 |
| 38975.890 | 38943.149 | 38916.839 | 38932.691 | 38930.355 |
| 40189.730 | 40212.308 | 40250.213 | 40264.565 | 40273.590 |
| 40278.703 | 40271.834 | 40280.548 | 40295.422 | 40297.743 |
| 40387.794 | 40346.315 | 40301.217 | 40317.445 | 40314.845 |
| 41261.416 | 41255.955 | 41261.420 | 41276.434 | 41280.295 |
| 41298.538 | 41281.167 | 41271.330 | 41286.657 | 41288.251 |



**Table S6.** SINGLE\_ANISO computed crystal field parameters for complexes **1** – **5**. The major components in the Table are in bold.  $B_k^q$  is the crystal field parameter and  $O_k^q$  is the extended Stevens operator. The quantization axis is chosen to be the main magnetic axis of the ground pseudo-Doublet. See Equation 2.

| k | q  | $B_k^q$                | $B_k^q$                | $B_k^q$                | $B_k^q$                | $B_k^q$                |
|---|----|------------------------|------------------------|------------------------|------------------------|------------------------|
|   |    | <b>1</b>               | <b>2</b>               | <b>3</b>               | <b>4</b>               | <b>5</b>               |
| 2 | -2 | <b>-0.74</b>           | 0.001                  | 0.03                   | -0.11                  | 0.05                   |
|   | -1 | 0.05                   | <b>0.85</b>            | <b>-0.52</b>           | <b>0.72</b>            | <b>-0.36</b>           |
|   | 0  | <b>-1.19</b>           | 0.11                   | -0.27                  | -0.23                  | -0.21                  |
|   | 1  | 0.24                   | -0.002                 | 0.19                   | 0.14                   | <b>0.34</b>            |
|   | 2  | <b>1.04</b>            | <b>-0.72</b>           | 0.27                   | 0.21                   | -0.05                  |
| 4 | -4 | 0.01                   | -0.0001                | -0.004                 | -0.001                 | 0.001                  |
|   | -3 | -0.005                 | -0.03                  | 0.01                   | -0.05                  | 0.01                   |
|   | -2 | 0.008                  | -0.0002                | 0.001                  | 0.001                  | 0.0001                 |
|   | -1 | 0.005                  | 0.006                  | 0.01                   | -0.05                  | 0.01                   |
|   | 0  | -0.003                 | -0.002                 | -0.01                  | -0.01                  | -0.01                  |
|   | 1  | 0.005                  | -0.0001                | -0.001                 | -0.0001                | -0.004                 |
|   | 2  | -0.001                 | 0.002                  | 0.002                  | 0.009                  | 0.005                  |
|   | 3  | 0.01                   | -0.0001                | -0.002                 | 0.007                  | 0.004                  |
|   | 4  | -0.01                  | 0.05                   | -0.04                  | -0.05                  | -0.05                  |
|   | 6  | $2.49 \times 10^{-4}$  | $-4.62 \times 10^{-7}$ | $1.75 \times 10^{-5}$  | $1.28 \times 10^{-5}$  | $-6.87 \times 10^{-6}$ |
| 6 | -5 | $1.25 \times 10^{-4}$  | $-1.27 \times 10^{-4}$ | $1.92 \times 10^{-4}$  | $-6.72 \times 10^{-4}$ | $1.56 \times 10^{-4}$  |
|   | -4 | $-1.44 \times 10^{-5}$ | $6.42 \times 10^{-7}$  | $-2.97 \times 10^{-5}$ | $-3.33 \times 10^{-5}$ | $9.42 \times 10^{-6}$  |
|   | -3 | $-1.0 \times 10^{-4}$  | $-1.18 \times 10^{-4}$ | $1.23 \times 10^{-4}$  | $-3.75 \times 10^{-4}$ | $8.95 \times 10^{-5}$  |
|   | -2 | $-2.66 \times 10^{-5}$ | $-9.72 \times 10^{-7}$ | $-3.39 \times 10^{-6}$ | $1.18 \times 10^{-5}$  | $-5.38 \times 10^{-6}$ |
|   | -1 | $-8.45 \times 10^{-5}$ | $2.68 \times 10^{-4}$  | $-6.14 \times 10^{-5}$ | $1.46 \times 10^{-4}$  | $-3.39 \times 10^{-5}$ |
|   | 0  | $2.54 \times 10^{-5}$  | $-1.64 \times 10^{-5}$ | $2.18 \times 10^{-5}$  | $1.24 \times 10^{-5}$  | $2.11 \times 10^{-5}$  |
|   | 1  | $-8.69 \times 10^{-5}$ | $6.58 \times 10^{-7}$  | $2.22 \times 10^{-6}$  | $-3.81 \times 10^{-6}$ | $1.11 \times 10^{-5}$  |
|   | 2  | $3.20 \times 10^{-5}$  | $4.37 \times 10^{-5}$  | $1.31 \times 10^{-5}$  | $9.04 \times 10^{-6}$  | $3.51 \times 10^{-5}$  |
|   | 3  | $1.01 \times 10^{-4}$  | $4.01 \times 10^{-6}$  | $-1.11 \times 10^{-5}$ | $5.81 \times 10^{-5}$  | $4.00 \times 10^{-5}$  |
|   | 4  | $2.04 \times 10^{-4}$  | $4.13 \times 10^{-5}$  | $-2.37 \times 10^{-4}$ | $-1.75 \times 10^{-4}$ | $-2.95 \times 10^{-4}$ |
|   | 5  | $1.08 \times 10^{-4}$  | $7.31 \times 10^{-6}$  | $-4.01 \times 10^{-6}$ | $1.23 \times 10^{-4}$  | $-5.98 \times 10^{-5}$ |
|   | 6  | $-1.50 \times 10^{-4}$ | $-5.94 \times 10^{-5}$ | $3.43 \times 10^{-5}$  | $-1.88 \times 10^{-5}$ | $7.70 \times 10^{-5}$  |

**Table S7.** Experimental X-ray data.

|                                                                       | <b>1</b>                                                                        | <b>2</b>                                                                        | <b>3</b>                                                                             | <b>4</b>                                                                        | <b>5</b>                                                         |
|-----------------------------------------------------------------------|---------------------------------------------------------------------------------|---------------------------------------------------------------------------------|--------------------------------------------------------------------------------------|---------------------------------------------------------------------------------|------------------------------------------------------------------|
| Formula <sup>A</sup>                                                  | DyC <sub>60</sub> H <sub>57</sub> O <sub>14</sub> N <sub>3</sub> P <sub>3</sub> | DyC <sub>72</sub> H <sub>60</sub> O <sub>13</sub> N <sub>3</sub> P <sub>4</sub> | DyC <sub>55.5</sub> H <sub>48</sub> O <sub>3.50</sub> Cl <sub>3</sub> P <sub>3</sub> | DyC <sub>72</sub> H <sub>60</sub> O <sub>4</sub> Cl <sub>3</sub> P <sub>4</sub> | DyC <sub>42</sub> H <sub>60</sub> O <sub>24</sub> N <sub>4</sub> |
| M, g mol <sup>-1</sup>                                                | 1299.50                                                                         | 1454.00                                                                         | 1132.70                                                                              | 1381.93                                                                         | 1544.13                                                          |
| Crystal system                                                        | monoclinic                                                                      | Orthorhombic                                                                    | Monoclinic                                                                           | Monoclinic                                                                      | Triclinic                                                        |
| Space group                                                           | <i>P2<sub>1</sub>/n</i>                                                         | <i>Pccn</i>                                                                     | <i>P2<sub>1</sub>/c</i>                                                              | <i>C2/c</i>                                                                     | <i>P-1</i>                                                       |
| a/[Å]                                                                 | 11.040(2)                                                                       | 16.0038(8)                                                                      | 19.684(4)                                                                            | 35.8608(10)                                                                     | 19.4549(2)                                                       |
| b/[Å]                                                                 | 19.136(4)                                                                       | 16.5124(4)                                                                      | 15.211(3)                                                                            | 43.6134(13)                                                                     | 19.8966(3)                                                       |
| c/[Å]                                                                 | 27.568(6)                                                                       | 26.6249(10)                                                                     | 34.082(7)                                                                            | 26.6974(7)                                                                      | 19.9214(3)                                                       |
| α/[°]                                                                 | 90                                                                              | 90                                                                              | 90                                                                                   | 90                                                                              | 90.3010(10)                                                      |
| β/[°]                                                                 | 94.95(3)                                                                        | 90                                                                              | 95.91(3)                                                                             | 96.885(3)                                                                       | 96.2960(10)                                                      |
| γ/[°]                                                                 | 90                                                                              | 90                                                                              | 90                                                                                   | 90                                                                              | 115.6120(10)                                                     |
| V/[Å <sup>3</sup> ]                                                   | 5802(2)                                                                         | 7035.9(6)                                                                       | 2622.9(17)                                                                           | 41454(2)                                                                        | 6899.72(16)                                                      |
| T/K                                                                   | 123(2)                                                                          | 123(2)                                                                          | 123(2)                                                                               | 123(2)                                                                          | 123(2)                                                           |
| Z                                                                     | 4                                                                               | 4                                                                               | 8                                                                                    | 20                                                                              | 4                                                                |
| ρ <sub>calc</sub> [g cm <sup>-3</sup> ]                               | 1.488                                                                           | 1.380                                                                           | 1.482                                                                                | 1.107                                                                           | 1.486                                                            |
| Δ <sup>B</sup> /[Å]                                                   | 0.71073                                                                         | 0.71073                                                                         | 0.71073                                                                              | 0.71073                                                                         | 0.71073                                                          |
| Data Measured                                                         | 94316                                                                           | 68643                                                                           | 167503                                                                               | 100982                                                                          | 149199                                                           |
| Ind. Reflns                                                           | 13724                                                                           | 8081                                                                            | 24163                                                                                | 40661                                                                           | 31378                                                            |
| R <sub>int</sub>                                                      | 0.0290                                                                          | 0.0679                                                                          | 0.0490                                                                               | 0.0538                                                                          | 0.0475                                                           |
| Reflns with I > 2σ(I)                                                 | 13141                                                                           | 6095                                                                            | 23070                                                                                | 27425                                                                           | 26632                                                            |
| Parameters                                                            | 734                                                                             | 457                                                                             | 1227                                                                                 | 1915                                                                            | 1585                                                             |
| Restraints                                                            | 0                                                                               | 38                                                                              | 0                                                                                    | 0                                                                               | 0                                                                |
| R <sub>1</sub> <sup>C</sup> (obs), wR <sub>2</sub> <sup>C</sup> (all) | 0.0312, 0.0833                                                                  | 0.0637, 0.1853                                                                  | 0.0322, 0.0826                                                                       | 0.0640, 0.1776                                                                  | 0.0377, 0.0745                                                   |
| goodness of fit                                                       | 1.047                                                                           | 1.124                                                                           | 1.076                                                                                | 1.022                                                                           | 1.064                                                            |
| Largest residuals/[e Å <sup>-3</sup> ]                                | 0.808, -1.486                                                                   | 2.159, -1.049                                                                   | 1.720, -1.560                                                                        | 5.513, -6.606                                                                   | 2.012, -1.264                                                    |

**Table S8.** Ab initio computed magnetic susceptibility ( $\chi T$ ) vs. Temperature (T) data for complexes **1** – **5**.

| Complex <b>1</b> |          | Complex <b>2</b> |          | Complex <b>3</b> |          | Complex <b>4</b> |          | Complex <b>5</b> |          |
|------------------|----------|------------------|----------|------------------|----------|------------------|----------|------------------|----------|
| T                | $\chi T$ |
| 1E-4             | 12.03473 | 1E-4             | 6.52085  | 1E-4             | 8.97161  | 1E-4             | 5.52242  | 1E-4             | 12.33576 |
| 3.0303           | 12.20402 | 3.0303           | 9.88178  | 3.0303           | 9.49832  | 3.0303           | 6.78696  | 3.0303           | 12.93715 |
| 6.06061          | 12.37327 | 6.06061          | 11.40351 | 6.06061          | 10.02242 | 6.06061          | 8.02715  | 6.06061          | 13.53705 |
| 9.09091          | 12.54029 | 9.09091          | 11.93654 | 9.09091          | 10.51744 | 9.09091          | 9.11559  | 9.09091          | 14.11824 |
| 12.12121         | 12.69641 | 12.12121         | 12.18309 | 12.12121         | 10.94784 | 12.12121         | 9.9702   | 12.12121         | 14.6503  |
| 15.15152         | 12.83288 | 15.15152         | 12.33164 | 15.15152         | 11.30407 | 15.15152         | 10.61262 | 15.15152         | 15.1129  |
| 18.18182         | 12.94706 | 18.18182         | 12.43983 | 18.18182         | 11.59395 | 18.18182         | 11.09348 | 18.18182         | 15.50093 |
| 21.21212         | 13.04097 | 21.21212         | 12.52876 | 21.21212         | 11.83001 | 21.21212         | 11.45788 | 21.21212         | 15.82009 |
| 24.24242         | 13.11835 | 24.24242         | 12.60721 | 24.24242         | 12.02404 | 24.24242         | 11.73937 | 24.24242         | 16.08104 |
| 27.27273         | 13.18297 | 27.27273         | 12.67914 | 27.27273         | 12.18563 | 27.27273         | 11.9616  | 27.27273         | 16.2951  |
| 30.30303         | 13.23802 | 30.30303         | 12.74644 | 30.30303         | 12.32216 | 30.30303         | 12.14093 | 30.30303         | 16.47229 |
| 33.33333         | 13.28595 | 33.33333         | 12.81006 | 33.33333         | 12.43915 | 33.33333         | 12.2887  | 33.33333         | 16.62073 |
| 36.36364         | 13.32856 | 36.36364         | 12.87048 | 36.36364         | 12.54071 | 36.36364         | 12.41277 | 36.36364         | 16.7467  |
| 39.39394         | 13.36713 | 39.39394         | 12.928   | 39.39394         | 12.62992 | 39.39394         | 12.51874 | 39.39394         | 16.85498 |
| 42.42424         | 13.40256 | 42.42424         | 12.9828  | 42.42424         | 12.7091  | 42.42424         | 12.61059 | 42.42424         | 16.94919 |
| 45.45455         | 13.43548 | 45.45455         | 13.03502 | 45.45455         | 12.78005 | 45.45455         | 12.69125 | 45.45455         | 17.03208 |
| 48.48485         | 13.46634 | 48.48485         | 13.08478 | 48.48485         | 12.84414 | 48.48485         | 12.7629  | 48.48485         | 17.10575 |
| 51.51515         | 13.49543 | 51.51515         | 13.13218 | 51.51515         | 12.90247 | 51.51515         | 12.82717 | 51.51515         | 17.17184 |
| 54.54545         | 13.52298 | 54.54545         | 13.17733 | 54.54545         | 12.95592 | 54.54545         | 12.88533 | 54.54545         | 17.23161 |
| 57.57576         | 13.54915 | 57.57576         | 13.22032 | 57.57576         | 13.00519 | 57.57576         | 12.93838 | 57.57576         | 17.28608 |
| 60.60606         | 13.57406 | 60.60606         | 13.26125 | 60.60606         | 13.05085 | 60.60606         | 12.9871  | 60.60606         | 17.33605 |
| 63.63636         | 13.59779 | 63.63636         | 13.30021 | 63.63636         | 13.09336 | 63.63636         | 13.03211 | 63.63636         | 17.38216 |
| 66.66667         | 13.62044 | 66.66667         | 13.3373  | 66.66667         | 13.13312 | 66.66667         | 13.07392 | 66.66667         | 17.42495 |
| 69.69697         | 13.64204 | 69.69697         | 13.37259 | 69.69697         | 13.17045 | 69.69697         | 13.11295 | 69.69697         | 17.46484 |
| 72.72727         | 13.66267 | 72.72727         | 13.40618 | 72.72727         | 13.20562 | 72.72727         | 13.14955 | 72.72727         | 17.5022  |
| 75.75758         | 13.68236 | 75.75758         | 13.43813 | 75.75758         | 13.23884 | 75.75758         | 13.18398 | 75.75758         | 17.53731 |
| 78.78788         | 13.70115 | 78.78788         | 13.46853 | 78.78788         | 13.27032 | 78.78788         | 13.21649 | 78.78788         | 17.57043 |
| 81.81818         | 13.7191  | 81.81818         | 13.49746 | 81.81818         | 13.30022 | 81.81818         | 13.24728 | 81.81818         | 17.60177 |
| 84.84848         | 13.73623 | 84.84848         | 13.52497 | 84.84848         | 13.32867 | 84.84848         | 13.27652 | 84.84848         | 17.63151 |
| 87.87879         | 13.75258 | 87.87879         | 13.55115 | 87.87879         | 13.35579 | 87.87879         | 13.30435 | 87.87879         | 17.65979 |
| 90.90909         | 13.76819 | 90.90909         | 13.57605 | 90.90909         | 13.38169 | 90.90909         | 13.33089 | 90.90909         | 17.68674 |
| 93.93939         | 13.78309 | 93.93939         | 13.59974 | 93.93939         | 13.40645 | 93.93939         | 13.35625 | 93.93939         | 17.71248 |
| 96.9697          | 13.79732 | 96.9697          | 13.62228 | 96.9697          | 13.43015 | 96.9697          | 13.38052 | 96.9697          | 17.73709 |
| 100              | 13.8109  | 100              | 13.64373 | 100              | 13.45286 | 100              | 13.40377 | 100              | 17.76067 |
| 103.0303         | 13.82387 | 103.0303         | 13.66415 | 103.0303         | 13.47465 | 103.0303         | 13.42608 | 103.0303         | 17.78329 |
| 106.06061        | 13.83626 | 106.06061        | 13.68358 | 106.06061        | 13.49557 | 106.06061        | 13.44752 | 106.06061        | 17.805   |
| 109.09091        | 13.84808 | 109.09091        | 13.70208 | 109.09091        | 13.51566 | 109.09091        | 13.46812 | 109.09091        | 17.82588 |
| 112.12121        | 13.85939 | 112.12121        | 13.7197  | 112.12121        | 13.53497 | 112.12121        | 13.48794 | 112.12121        | 17.84595 |
| 115.15152        | 13.87018 | 115.15152        | 13.73648 | 115.15152        | 13.55354 | 115.15152        | 13.50703 | 115.15152        | 17.86529 |
| 118.18182        | 13.8805  | 118.18182        | 13.75246 | 118.18182        | 13.57141 | 118.18182        | 13.52542 | 118.18182        | 17.88391 |
| 121.21212        | 13.89037 | 121.21212        | 13.7677  | 121.21212        | 13.58861 | 121.21212        | 13.54315 | 121.21212        | 17.90186 |
| 124.24242        | 13.89981 | 124.24242        | 13.78222 | 124.24242        | 13.60517 | 124.24242        | 13.56025 | 124.24242        | 17.91918 |
| 127.27273        | 13.90884 | 127.27273        | 13.79607 | 127.27273        | 13.62112 | 127.27273        | 13.57676 | 127.27273        | 17.93589 |
| 130.30303        | 13.91747 | 130.30303        | 13.80928 | 130.30303        | 13.6365  | 130.30303        | 13.59269 | 130.30303        | 17.95202 |
| 133.33333        | 13.92574 | 133.33333        | 13.82189 | 133.33333        | 13.65132 | 133.33333        | 13.60807 | 133.33333        | 17.9676  |
| 136.36364        | 13.93366 | 136.36364        | 13.83392 | 136.36364        | 13.66561 | 136.36364        | 13.62293 | 136.36364        | 17.98265 |
| 139.39394        | 13.94125 | 139.39394        | 13.84542 | 139.39394        | 13.67938 | 139.39394        | 13.6373  | 139.39394        | 17.9972  |
| 142.42424        | 13.94852 | 142.42424        | 13.8564  | 142.42424        | 13.69268 | 142.42424        | 13.65118 | 142.42424        | 18.01126 |
| 145.45455        | 13.95549 | 145.45455        | 13.86689 | 145.45455        | 13.7055  | 145.45455        | 13.6646  | 145.45455        | 18.02485 |

|           |          |           |          |           |          |           |          |           |          |
|-----------|----------|-----------|----------|-----------|----------|-----------|----------|-----------|----------|
| 148.48485 | 13.96217 | 148.48485 | 13.87693 | 148.48485 | 13.71788 | 148.48485 | 13.67758 | 148.48485 | 18.038   |
| 151.51515 | 13.96859 | 151.51515 | 13.88653 | 151.51515 | 13.72983 | 151.51515 | 13.69013 | 151.51515 | 18.05073 |
| 154.54546 | 13.97475 | 154.54546 | 13.89571 | 154.54546 | 13.74136 | 154.54546 | 13.70228 | 154.54546 | 18.06304 |
| 157.57576 | 13.98066 | 157.57576 | 13.90451 | 157.57576 | 13.7525  | 157.57576 | 13.71404 | 157.57576 | 18.07495 |
| 160.60606 | 13.98634 | 160.60606 | 13.91293 | 160.60606 | 13.76327 | 160.60606 | 13.72542 | 160.60606 | 18.08649 |
| 163.63636 | 13.9918  | 163.63636 | 13.921   | 163.63636 | 13.77366 | 163.63636 | 13.73643 | 163.63636 | 18.09766 |
| 166.66667 | 13.99705 | 166.66667 | 13.92874 | 166.66667 | 13.78371 | 166.66667 | 13.7471  | 166.66667 | 18.10847 |
| 169.69697 | 14.0021  | 169.69697 | 13.93616 | 169.69697 | 13.79342 | 169.69697 | 13.75743 | 169.69697 | 18.11895 |
| 172.72727 | 14.00697 | 172.72727 | 13.94328 | 172.72727 | 13.80281 | 172.72727 | 13.76743 | 172.72727 | 18.1291  |
| 175.75758 | 14.01165 | 175.75758 | 13.95012 | 175.75758 | 13.81189 | 175.75758 | 13.77713 | 175.75758 | 18.13894 |
| 178.78788 | 14.01615 | 178.78788 | 13.95668 | 178.78788 | 13.82067 | 178.78788 | 13.78652 | 178.78788 | 18.14847 |
| 181.81818 | 14.0205  | 181.81818 | 13.96299 | 181.81818 | 13.82917 | 181.81818 | 13.79563 | 181.81818 | 18.15772 |
| 184.84849 | 14.02469 | 184.84849 | 13.96905 | 184.84849 | 13.83739 | 184.84849 | 13.80445 | 184.84849 | 18.16668 |
| 187.87879 | 14.02873 | 187.87879 | 13.97488 | 187.87879 | 13.84535 | 187.87879 | 13.81301 | 187.87879 | 18.17537 |
| 190.90909 | 14.03262 | 190.90909 | 13.98049 | 190.90909 | 13.85305 | 190.90909 | 13.82131 | 190.90909 | 18.18379 |
| 193.93939 | 14.03638 | 193.93939 | 13.98589 | 193.93939 | 13.86051 | 193.93939 | 13.82936 | 193.93939 | 18.19197 |
| 196.9697  | 14.04002 | 196.9697  | 13.99109 | 196.9697  | 13.86773 | 196.9697  | 13.83717 | 196.9697  | 18.1999  |
| 200       | 14.04353 | 200       | 13.9961  | 200       | 13.87473 | 200       | 13.84475 | 200       | 18.2076  |
| 203.0303  | 14.04692 | 203.0303  | 14.00093 | 203.0303  | 13.88151 | 203.0303  | 13.8521  | 203.0303  | 18.21507 |
| 206.06061 | 14.0502  | 206.06061 | 14.00558 | 206.06061 | 13.88809 | 206.06061 | 13.85924 | 206.06061 | 18.22233 |
| 209.09091 | 14.05337 | 209.09091 | 14.01007 | 209.09091 | 13.89446 | 209.09091 | 13.86617 | 209.09091 | 18.22937 |
| 212.12121 | 14.05645 | 212.12121 | 14.0144  | 212.12121 | 13.90063 | 212.12121 | 13.8729  | 212.12121 | 18.23621 |
| 215.15151 | 14.05942 | 215.15151 | 14.01859 | 215.15151 | 13.90663 | 215.15151 | 13.87944 | 215.15151 | 18.24286 |
| 218.18182 | 14.0623  | 218.18182 | 14.02263 | 218.18182 | 13.91244 | 218.18182 | 13.88578 | 218.18182 | 18.24931 |
| 221.21212 | 14.06509 | 221.21212 | 14.02653 | 221.21212 | 13.91808 | 221.21212 | 13.89195 | 221.21212 | 18.25559 |
| 224.24242 | 14.06779 | 224.24242 | 14.0303  | 224.24242 | 13.92355 | 224.24242 | 13.89795 | 224.24242 | 18.26168 |
| 227.27273 | 14.07041 | 227.27273 | 14.03395 | 227.27273 | 13.92887 | 227.27273 | 13.90378 | 227.27273 | 18.26761 |
| 230.30303 | 14.07296 | 230.30303 | 14.03748 | 230.30303 | 13.93403 | 230.30303 | 13.90944 | 230.30303 | 18.27337 |
| 233.33333 | 14.07543 | 233.33333 | 14.0409  | 233.33333 | 13.93904 | 233.33333 | 13.91495 | 233.33333 | 18.27898 |
| 236.36364 | 14.07782 | 236.36364 | 14.04421 | 236.36364 | 13.94391 | 236.36364 | 13.92031 | 236.36364 | 18.28443 |
| 239.39394 | 14.08015 | 239.39394 | 14.04741 | 239.39394 | 13.94864 | 239.39394 | 13.92552 | 239.39394 | 18.28974 |
| 242.42424 | 14.08241 | 242.42424 | 14.05052 | 242.42424 | 13.95324 | 242.42424 | 13.93059 | 242.42424 | 18.2949  |
| 245.45455 | 14.08461 | 245.45455 | 14.05353 | 245.45455 | 13.95771 | 245.45455 | 13.93553 | 245.45455 | 18.29992 |
| 248.48485 | 14.08675 | 248.48485 | 14.05644 | 248.48485 | 13.96205 | 248.48485 | 13.94033 | 248.48485 | 18.30481 |
| 251.51515 | 14.08883 | 251.51515 | 14.05927 | 251.51515 | 13.96628 | 251.51515 | 13.94501 | 251.51515 | 18.30957 |
| 254.54546 | 14.09085 | 254.54546 | 14.06202 | 254.54546 | 13.9704  | 254.54546 | 13.94956 | 254.54546 | 18.31421 |
| 257.57576 | 14.09282 | 257.57576 | 14.06469 | 257.57576 | 13.9744  | 257.57576 | 13.954   | 257.57576 | 18.31873 |
| 260.60606 | 14.09473 | 260.60606 | 14.06728 | 260.60606 | 13.9783  | 260.60606 | 13.95832 | 260.60606 | 18.32313 |
| 263.63636 | 14.0966  | 263.63636 | 14.0698  | 263.63636 | 13.98209 | 263.63636 | 13.96253 | 263.63636 | 18.32742 |
| 266.66667 | 14.09842 | 266.66667 | 14.07224 | 266.66667 | 13.98578 | 266.66667 | 13.96664 | 266.66667 | 18.33159 |
| 269.69697 | 14.10019 | 269.69697 | 14.07462 | 269.69697 | 13.98938 | 269.69697 | 13.97064 | 269.69697 | 18.33567 |
| 272.72727 | 14.10192 | 272.72727 | 14.07693 | 272.72727 | 13.99289 | 272.72727 | 13.97454 | 272.72727 | 18.33964 |
| 275.75758 | 14.10361 | 275.75758 | 14.07918 | 275.75758 | 13.9963  | 275.75758 | 13.97834 | 275.75758 | 18.34352 |
| 278.78788 | 14.10525 | 278.78788 | 14.08137 | 278.78788 | 13.99963 | 278.78788 | 13.98205 | 278.78788 | 18.34729 |
| 281.81818 | 14.10686 | 281.81818 | 14.0835  | 281.81818 | 14.00288 | 281.81818 | 13.98567 | 281.81818 | 18.35098 |
| 284.84848 | 14.10843 | 284.84848 | 14.08558 | 284.84848 | 14.00605 | 284.84848 | 13.9892  | 284.84848 | 18.35458 |
| 287.87879 | 14.10996 | 287.87879 | 14.0876  | 287.87879 | 14.00913 | 287.87879 | 13.99265 | 287.87879 | 18.35809 |
| 290.90909 | 14.11146 | 290.90909 | 14.08957 | 290.90909 | 14.01215 | 290.90909 | 13.99601 | 290.90909 | 18.36152 |
| 293.93939 | 14.11292 | 293.93939 | 14.0915  | 293.93939 | 14.01509 | 293.93939 | 13.99929 | 293.93939 | 18.36486 |
| 296.9697  | 14.11435 | 296.9697  | 14.09337 | 296.9697  | 14.01796 | 296.9697  | 14.0025  | 296.9697  | 18.36813 |
| 300       | 14.11575 | 300       | 14.0952  | 300       | 14.02076 | 300       | 14.00563 | 300       | 18.37132 |
